# Supplementary material for: Accelerated alkaline hydrogen evolution on M(OH)x/M-MoPOx (M = Ni, Co, Fe, Mn) electrocatalysts by coupling water dissociation and hydrogen ad-desorption steps
Source: Royal Society of Chemistry journal article supplement (doi:10.1039/c9sc04603h), 2020-01-01
Supplement: c9sc04603h1.pdf [file c9sc04603h1.pdf]

## Supporting Information

### **Accelerated Alkaline Hydrogen Evolution on $M(OH)_x/M-MoPO_x$ ( $M = Ni, Co, Fe, Mn$ ) Electrocatalysts by Coupling Water Dissociation and Hydrogen Ad-Desorption Steps**

*Lishan Peng<sup>†</sup>, Mansheng Liao<sup>†</sup>, Xingqun Zheng<sup>†</sup>, Yao Nie, Ling Zhang, Minjie Wang, Rui Xiang, Jian Wang, Li Li, Zidong Wei\**

#### **Content:**

Experiment and computational details

Figure S1-27

Table S1-6

# 1. Experiment and computational details

## 1.1 Experiment and computational details

*Synthesis of  $M(\text{Ni}, \text{Co}, \text{Fe}, \text{Mn})\text{-MoO}_4/\text{NF}$  precursors:* All chemical reagents used in this experiment were of analytical grade. Prior to the synthesis, the Ni Foam (NF, 50.0 mm×10.0 mm×1.0 mm) was cleaned ultrasonically in a 3.0 mol L<sup>-1</sup> HCl solution for 15 min to remove the surface oxide layer, and then placed against the wall of a Teflon-lined stainless steel autoclave at a certain angle. Afterwards, 30 mL aqueous solution with 1.50 mol Ni(NO<sub>3</sub>)<sub>2</sub>•6H<sub>2</sub>O and 0.22 mol (NH<sub>4</sub>)<sub>6</sub>Mo<sub>7</sub>O<sub>24</sub>•4H<sub>2</sub>O was transferred into the above Teflon autoclave. The autoclave was sealed and heated at 150 °C for 6 h. After the hydrothermal reaction was over, the precursors were completely washed with distilled water and dried in an oven at 60 °C. Other  $M(\text{Ni}, \text{Co}, \text{Fe}, \text{Mn})\text{-MoO}_4/\text{NF}$  precursors were synthesized by the same process but changed the Ni(NO<sub>3</sub>)<sub>2</sub>•6H<sub>2</sub>O by the corresponding metal nitrates.

*Synthesis of  $M(\text{Ni}, \text{Co}, \text{Fe}, \text{Mn})\text{-MoPO}_x/\text{NF}$ :* The  $\text{NiMoO}_4/\text{NF}$  precursors with an area of 10 cm<sup>2</sup> and 1.2 g NaH<sub>2</sub>PO<sub>2</sub> were put in a porcelain boat with a distance of 2 cm and NaH<sub>2</sub>PO<sub>2</sub> was placed at the upstream side of the furnace. Then the furnace was heated up to 400 °C with a ramp of 5 °C min<sup>-1</sup> and stayed for 2 h in the near-static Ar atmosphere. The obtained sample was labelled as  $\text{NiMoPO}_x/\text{NF}$ , and can be directly used as work electrode. For purposes of comparison,  $\text{NiMoO}_4/\text{NF}$  were prepared as described above without adding NaH<sub>2</sub>PO<sub>2</sub>. Other  $M(\text{Ni}, \text{Co}, \text{Fe}, \text{Mn})\text{-MoPO}_x/\text{NF}$  were synthesized by the same process.

*Synthesis of  $M(\text{OH})_x/\text{MMoPO}_x/\text{NF}$ :* The  $\text{NiMoPO}_x/\text{NF}$  was directly used as work electrode in a three-electrode cell system in 1.0 M NaOH. The electrochemical activation was conducted by CV at -0.3V ~ +0.2V vs. RHE with 100 mV/s for 8000 cycles. The obtained catalytic electrode was named as  $\text{Ni}(\text{OH})_2/\text{NiMoPO}_x$ . All the  $M(\text{Ni}, \text{Co}, \text{Fe}, \text{Mn})\text{-MoPO}_x/\text{NF}$  were activated by the same process. The  $\text{NiMoPO}_x/\text{NF}$  activated by different number of CV cycles name as  $\text{NiMoPO}_x^*/\text{NF}-n$  CVs. Without special noted, the sample named  $\text{Ni}(\text{OH})_2/\text{NiMoPO}_x$  means  $M(\text{Ni}, \text{Co}, \text{Fe}, \text{Mn})\text{-MoPO}_x/\text{NF}$  activated by CV for 8000 cycles. The catalyst loading on the NF is about 1 mg cm<sup>-1</sup>.

*Synthesis of  $M(\text{Ni}, \text{Co}, \text{Fe}, \text{Mn})\text{-MoP}_2/\text{NF}$ :* The  $\text{NiMoO}_4/\text{NF}$  precursors with an area of 10 cm<sup>2</sup> and 1.2 g NaH<sub>2</sub>PO<sub>2</sub> were put in a porcelain boat with a distance of 2 cm and NaH<sub>2</sub>PO<sub>2</sub> was placed at the upstream side of the furnace. Then the furnace was heated up to 650 °C with a ramp of 5 °C min<sup>-1</sup> and stayed for 2 h in the Ar/H<sub>2</sub> (90/10 sccm) atmosphere. The obtained sample was labelled as  $\text{NiMoP}_2/\text{NF}$ , and can be directly used as work electrode. Other  $M(\text{Ni}, \text{Co}, \text{Fe}, \text{Mn})\text{-MoPO}_x/\text{NF}$  were synthesized by the same process.

*Synthesis of 20% Pt/C/NF electrode:* The commercial Pt/C (20 wt% Pt loading, Johnson Matthey) were prepared by ultrasonically mixing 4 mg of the catalyst powder with the mixture of 40 μL 5% Nafion solution, 560 μL ethanol and 400 μL H<sub>2</sub>O for 15 min to form homogeneous catalyst ink. Next, a certain volume of the ink was carefully dropped onto the clean Ni foam, leading to a desirable catalyst loading of about 1.0 mg cm<sup>-2</sup> (labelled: 20% Pt/C/NF).

## 1.2 Characterization and electrochemical measurements

The surface morphology and the microstructure of the catalysts were analyzed by X-ray diffraction (XRD-6000, Shimadzu), X-ray photoelectron spectroscopy (XPS, PHI 550 ESCA/SAM), field-emission scanning electron microscopy (FE-SEM, JSM-7800, Japan), and energy dispersive X-ray spectra (EDX, OXFORD Link-ISIS-300), respectively. Electrochemical measurements were conducted in a three-electrode cell system with an Electrochemical Workstation (Auto Lab, Metrohm China Ltd, China). The electrode area of the working electrode is 1.0 cm<sup>2</sup>. A carbon rod in parallel orientation to the working electrode was used as the counter electrode and Hg/HgO electrode as the reference electrode. Linear sweep voltammetry (LSV) was performed in N<sub>2</sub> saturated aqueous solution with a scan rate of 5 mV s<sup>-1</sup>. The long-term durability test was carried out by chronopotentiometry measurements at -100 mV for 90 h. The double layer capacitance of the electrodes was obtained by cyclic voltammetry (CV) from 0.1 to 0.3 V (vs RHE) at scan rate from 2 to 7 mV s<sup>-1</sup>. The catalytic performance of the prepared electrodes toward HER were systematically investigated in 1.0 M NaOH electrolyte. Electrochemical impedance spectroscopy (EIS) was performed at different overpotentials in the frequency range of 10<sup>5</sup> Hz to 0.01 Hz with a perturbation amplitude of 5 mV. All potentials mentioned in this work were converted to the values with reference to a reversible hydrogen electrode (RHE) via  $E(\text{RHE}) = E(\text{Hg/HgO}) + 0.9334 \text{ V}$  in 1 M NaOH and all data without *iR* correction unless noted.

The electrolyte (NaOH) used for hydrogen evolution reaction in this work is sourced from Aladdin (99.9%). For rigorously metal impurities-free measurements, the 1 M NaOH electrolyte was purified as follows. In a H<sub>2</sub>SO<sub>4</sub>-cleaned 50 mL polypropylene centrifuge tube, ~2 g of 99.999% Ni(NO<sub>3</sub>)<sub>2</sub>·6H<sub>2</sub>O were dissolved in ~4 mL of 18.2 MΩ·cm H<sub>2</sub>O. 20 mL of 1 M NaOH were added to precipitate high-purity Ni(OH)<sub>2</sub>. The mixture was shaken and centrifuged, and the supernatant was decanted. The Ni(OH)<sub>2</sub> then underwent three washing cycles by adding ~20 mL of 18.2 MΩ·cm water and ~2 mL of 1 M NaOH to the tube, re-dispersing the solid, centrifuging, and decanting the supernatant. Finally, the tube was filled with 50 mL of 1 M NaOH for purification. The solid was re-dispersed and mechanically agitated for at least 10 min, followed by at least 3 h of resting. The mixture was centrifuged, and the purified NaOH supernatant was decanted into a H<sub>2</sub>SO<sub>4</sub>-cleaned polypropylene bottle for storage.

The concentration of PO<sub>3</sub><sup>3-</sup> dissolved in the electrolyte during electrochemical activation process was detected via phosphomolybdenum blue method using UV-vis-NIR spectroscopy. Typically, 2 mL electrolyte was removed from the cathode chamber and mixed with 2 mL of 0.01 M (NH<sub>4</sub>)<sub>2</sub>MoO<sub>4</sub> solution, followed by the addition of 2 mL of 0.01 M ascorbic acid and 2 mL of 0.5 M H<sub>2</sub>SO<sub>4</sub> solution. After incubation at room temperature for 2 h, the UV-vis adsorption spectra with absorbance at ~750 nm was measured using a spectrophotometer.

### 1.3 Theoretical calculation details

Density functional theory (DFT) calculations were performed by utilizing the Vienna Ab-Initio Simulation Package (VASP) code. The projector augmented wave (PAW) method was used to describe the ionic cores. And the electron exchange-correlation was modelled by Perdew-Burke-Ernzerh of (PBE) function within generalized gradient approximation (GGA). A cut-off

energy of 450 eV was used for the plane-wave basis set. The convergence criterion was  $10^{-5}$  eV for energy and 0.03 eV/Å for force. The Monkhorst–Pack k-point mesh were set to be  $3 \times 3 \times 1$  for all systems. To separate adjacent periodic images a 15 Å thick vacuum along the vertical direction was added. In all the structure optimization calculations, the bottom three atomic layers were fixed while other atoms were fully relaxed. Transition states for H<sub>2</sub>O dissociation were located using the climbing image-nudged elastic band (CI-NEB) method.

For H adsorption,  $\Delta E_H$  is hydrogen adsorption energy, and it is defined by:  $\Delta E_H = E_{\text{surface+H}} - E_{\text{surface}} - 1/2E_{H_2}$

$E_{\text{surface+H}}$  is the total energy of surface with an adsorbed H atom,  $E_{\text{surface}}$  the energy of surface,  $E_{H_2}$  is the energy of a gas H<sub>2</sub>.

For OH adsorption enrgy:  $\Delta E_{OH} = E_{\text{surface+OH}} - E_{\text{surface}} - E_{OH}$

$E_{\text{surface+OH}}$  is the total energy of surface with an adsorbed OH radical, and  $E_{OH}$  is the energy of single OH radical.

The Gibbs free reaction energy of hydrogen adsorption  $\Delta G_H$  was calculated as follow:  $\Delta G_H = \Delta E_H + \Delta E_{ZPE} - T\Delta S_H$

Where  $\Delta E_{ZPE}$  is the difference in zero point energy, and  $\Delta S_H$  is the difference in entropy between the adsorbed and the gas phase.  $\Delta E_{ZPE} - T\Delta S_H$  is about 0.24 eV.

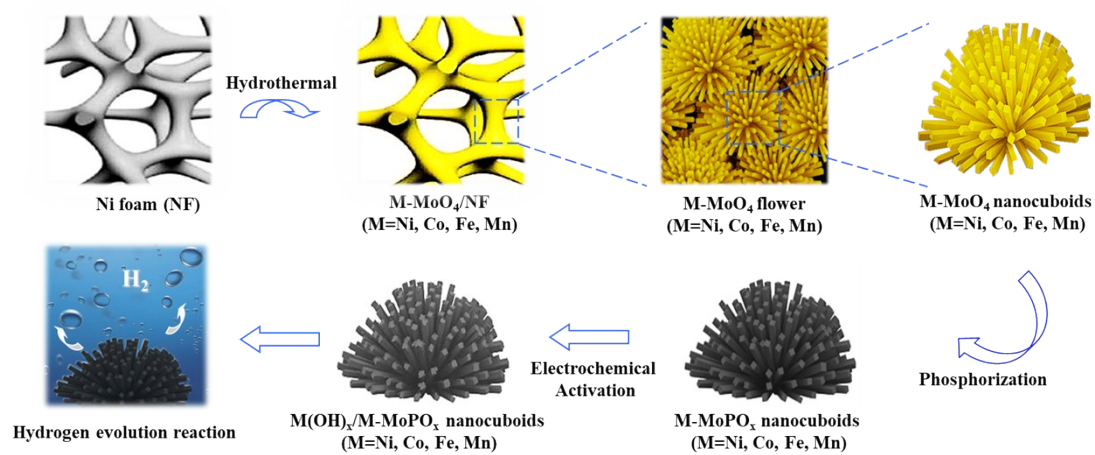

Scheme S1. Schematic illustration of the synthesis processes of M-MoO<sub>4</sub>/NF, M-MoPO<sub>x</sub>/NF and activated M(OH)<sub>x</sub>/M-MoPO<sub>x</sub>/NF.

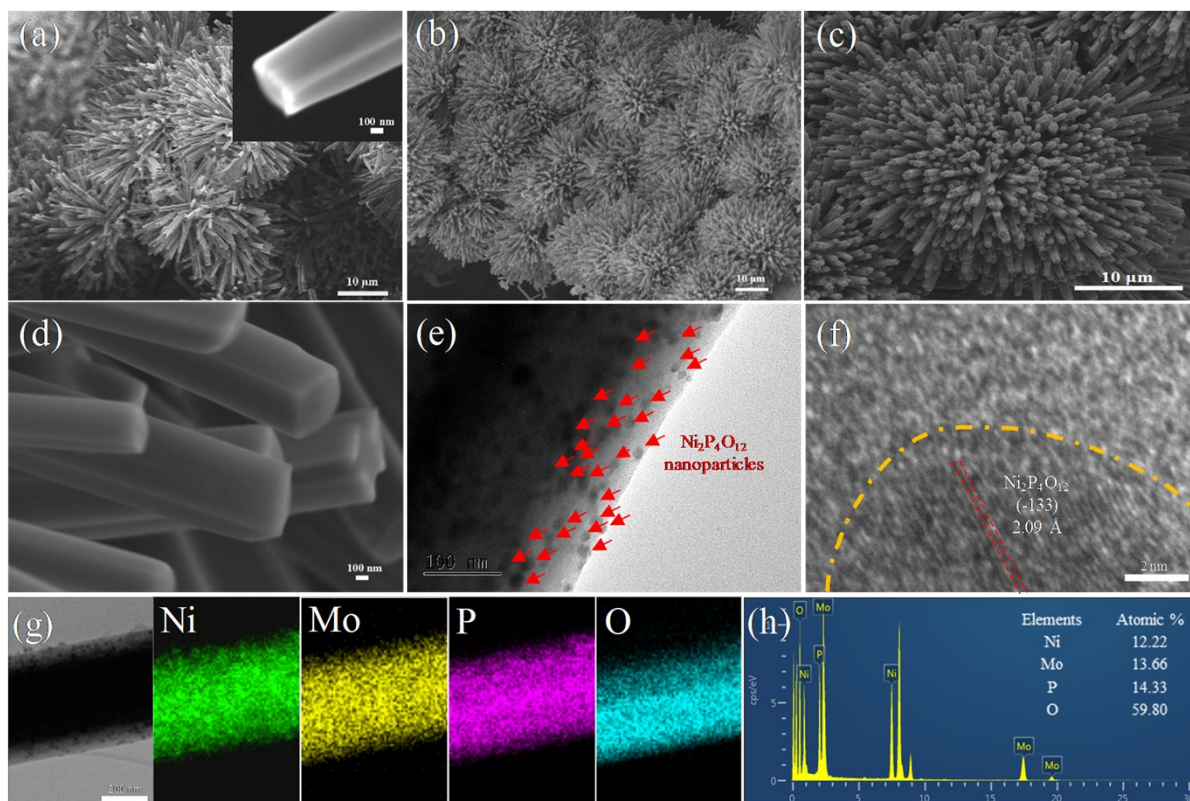

Figure S1. SEM images of (a) NiMoO<sub>4</sub>/NF, and (b-d) NiMoPO<sub>x</sub>/NF, inset in (a) is the SEM image of Ni foam. (e) TEM, (f) HR-TEM images, (g) elemental mapping and (h) EDX spectrum of NiMoPO<sub>x</sub> powder.

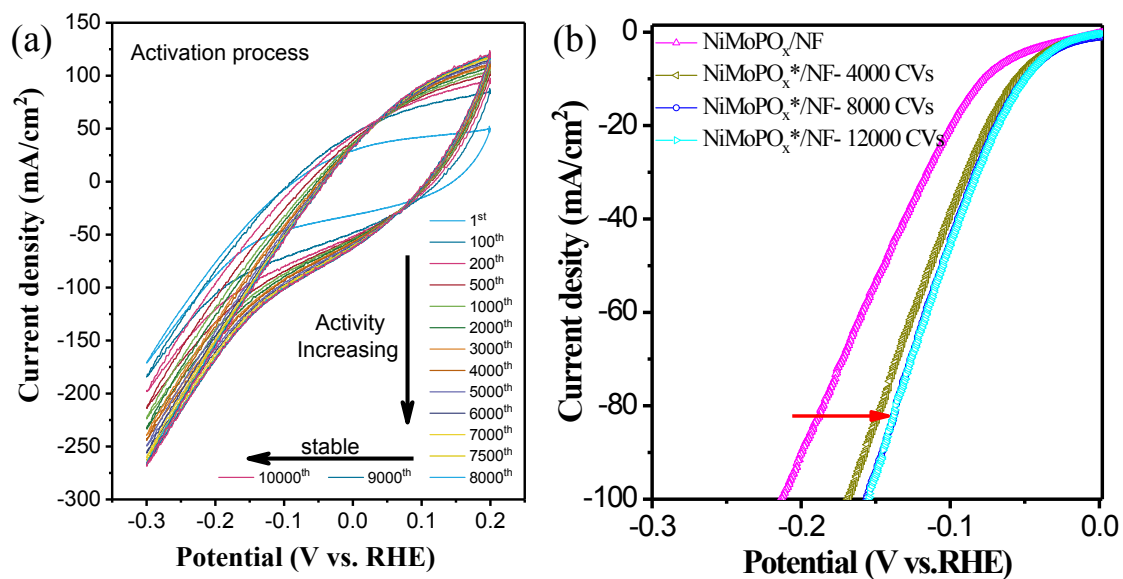

Figure S2. (a) Electrochemical activation of NiMoPO<sub>x</sub>/NF by CVs, (b) LSV curves of NiMoPO<sub>x</sub>/NF activated with different CVs without iR correction, (c) XRD patterns of NiMoO<sub>4</sub>/NF, NiMoPO<sub>x</sub>/NF, Ni(OH)<sub>2</sub>/NiMoPO<sub>x</sub>/NF and Ni foam.

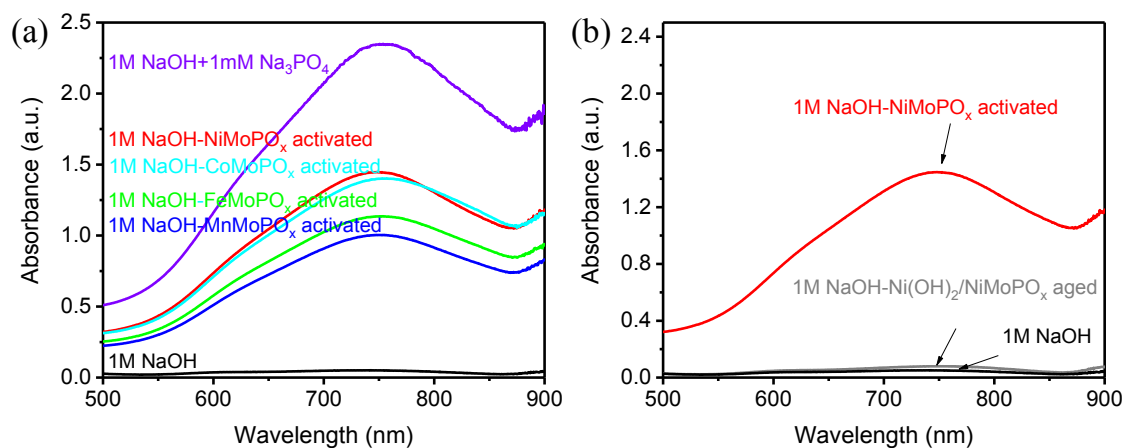

Figure S3. UV-vis absorption spectra of dissolved  $\text{PO}_3^{3-}$  in (a) M-MoPO<sub>x</sub> activated electrolytes and (b) Ni(OH)<sub>2</sub>/NiMoPO<sub>x</sub> aged electrolyte.



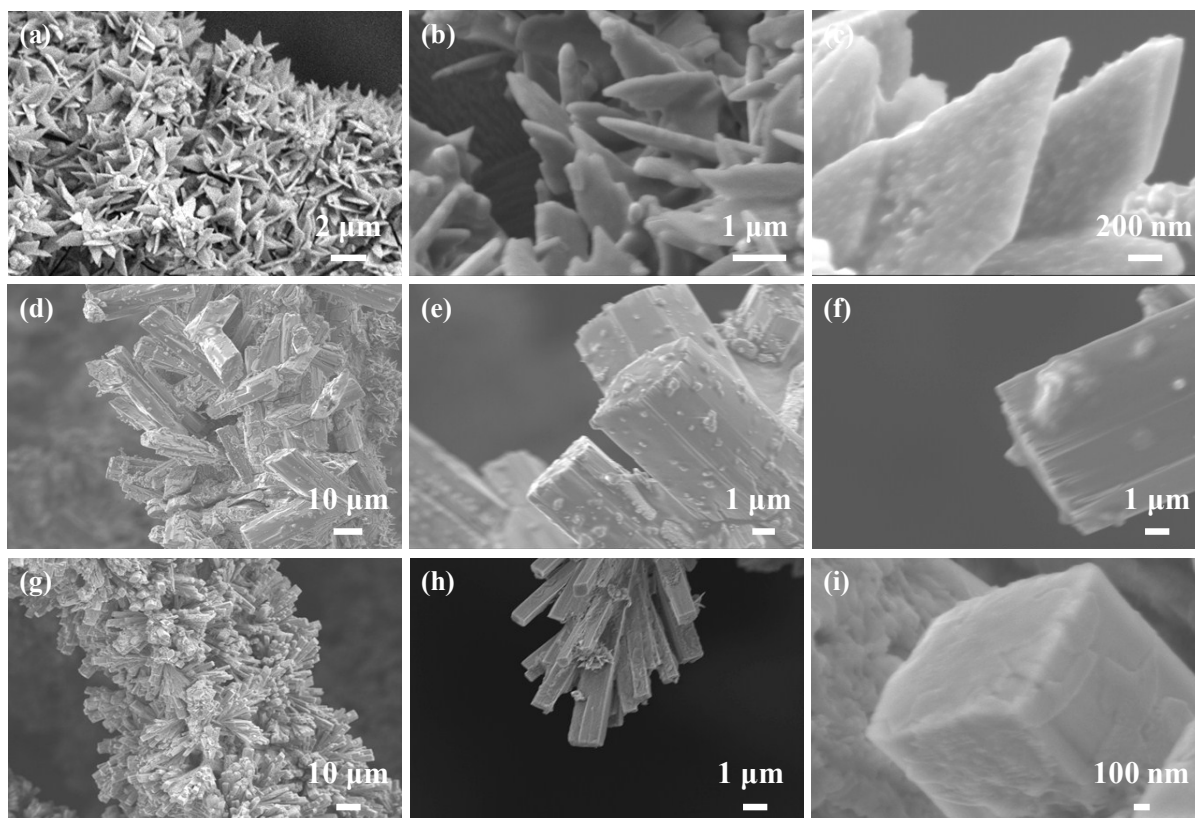

Figure S4. SEM images of (a-c) FeMoPO<sub>x</sub>/NF, (d-f) MnMoPO<sub>x</sub>/NF, (g-i) CoMoPO<sub>x</sub>/NF electrodes.

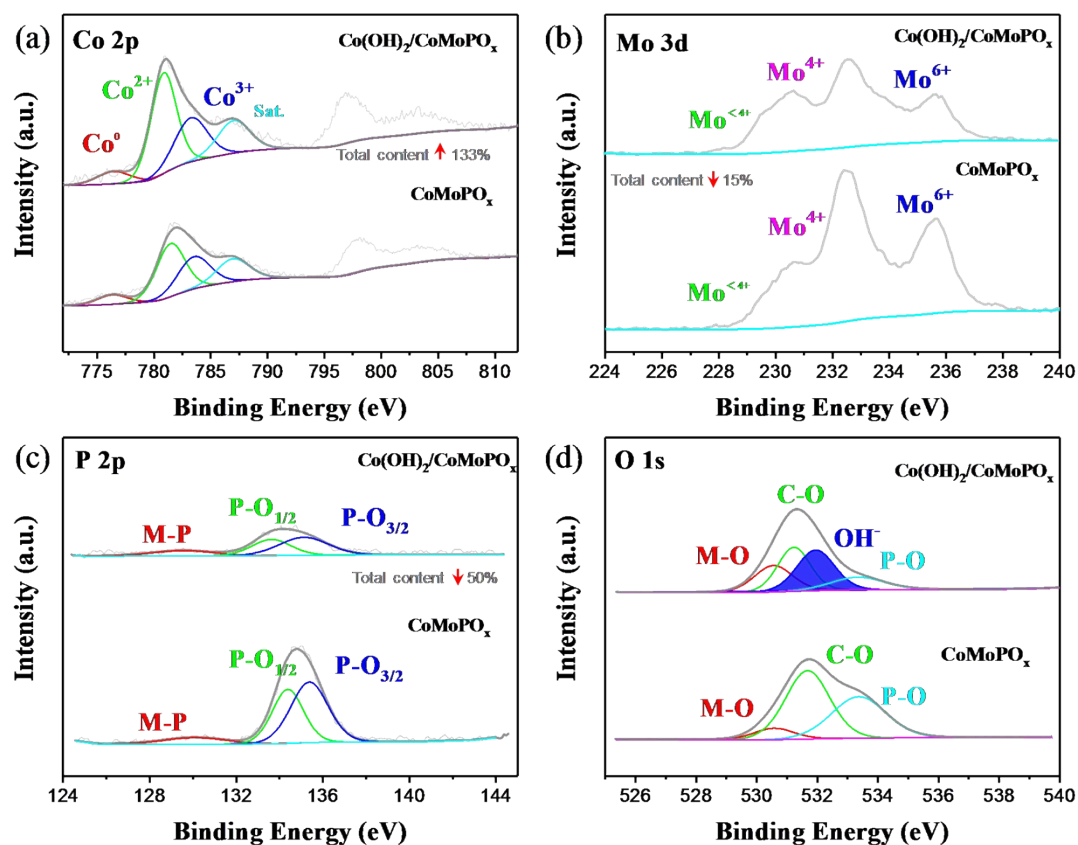

Figure S5. XPS spectra of CoMoPO<sub>4</sub>, and Co(OH)<sub>2</sub>/CoMoPO<sub>x</sub>, (a) Co 2p region, (b) Mo 3d region, (c) P 2p region and (d) O 1s region.

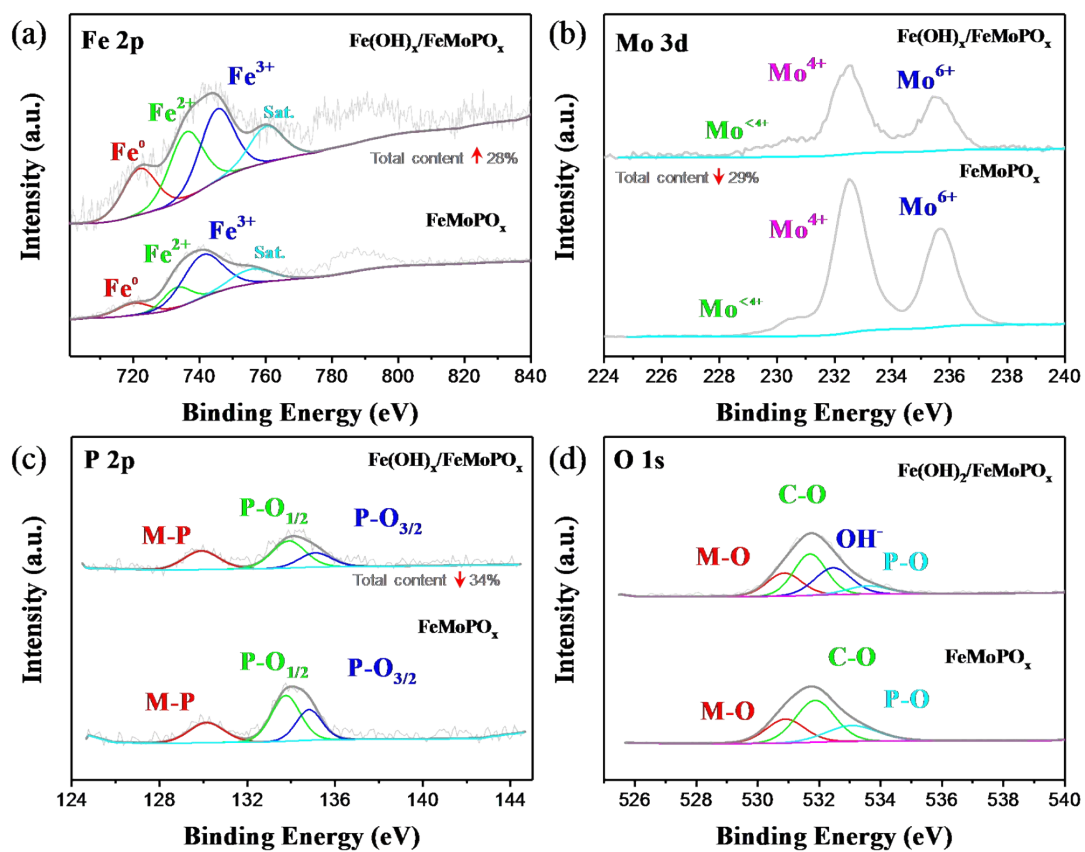

Figure S6. XPS spectra of FeMoPO<sub>4</sub> and Fe(OH)<sub>x</sub>/FeMoPO<sub>4</sub>, (a) Fe 2p region, (b) Mo 3d region, (c) P 2p region and (d) O 1s region.

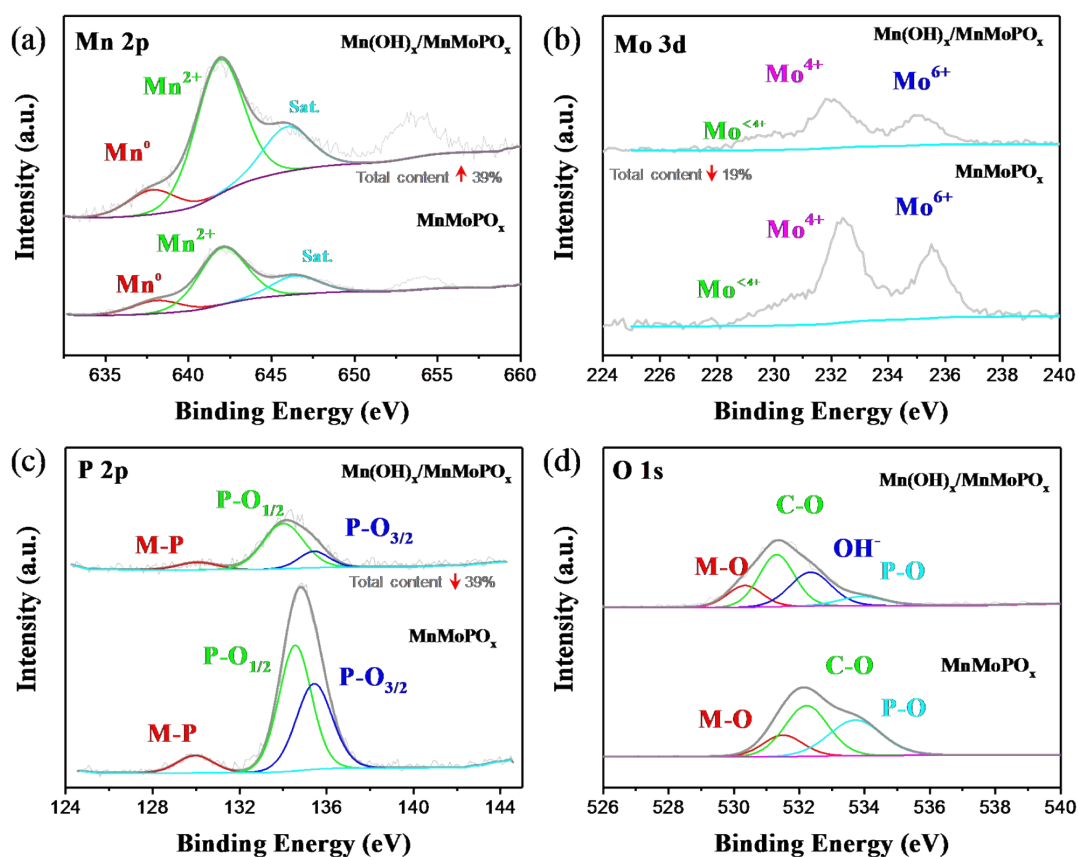

Figure S7. XPS spectra of  $\text{MnMoPO}_4$ , and  $\text{Mn(OH)}_x/\text{MnMoPO}_x$ , (a) Mn 2p region, (b) Mo 3d region, (c) P 2p region and (d) O 1s region.

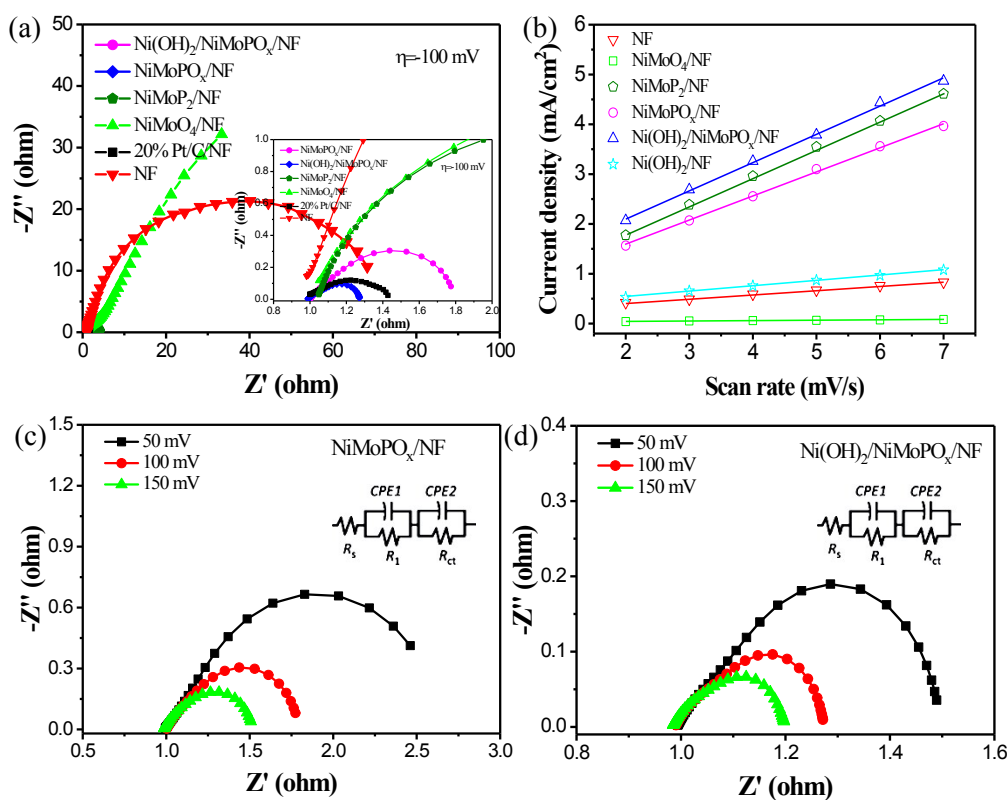

Figure S8. (a) Nyquist plots of the corresponding samples measured at a voltage of  $-0.1 \text{ V}$  (vs RHE) over the frequency range  $100 \text{ kHz}$  to  $0.01 \text{ Hz}$  in  $1.0 \text{ M NaOH}$ ; (b) Estimation of  $C_{dl}$  by plotting the current density variation ( $\Delta j = (j_a - j_c)/2$ ). Nyquist plots of (c)  $\text{NiMoPO}_x/\text{NF}$ , (d)  $\text{Ni(OH)}_2/\text{NiMoPO}_x/\text{NF}$  measured at different voltage over the frequency range  $100 \text{ kHz}$  to  $0.01 \text{ Hz}$  in  $1.0 \text{ M NaOH}$ .

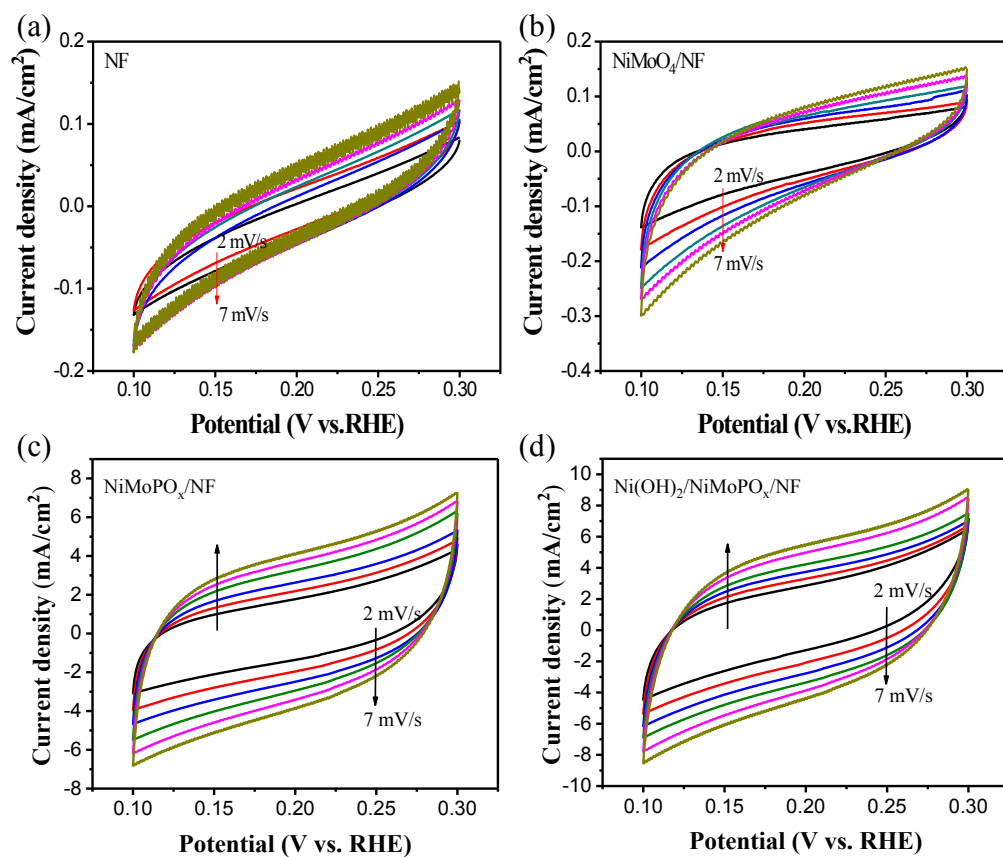

Figure S9. CVs of NF, NiMoO<sub>4</sub>/NF, NiMoPO<sub>x</sub>/NF, and Ni(OH)<sub>2</sub>/NiMoPO<sub>x</sub>/NF with various scan rates (2-7 mV/s) in the region of 0.1 to 0.3 V vs. RHE.

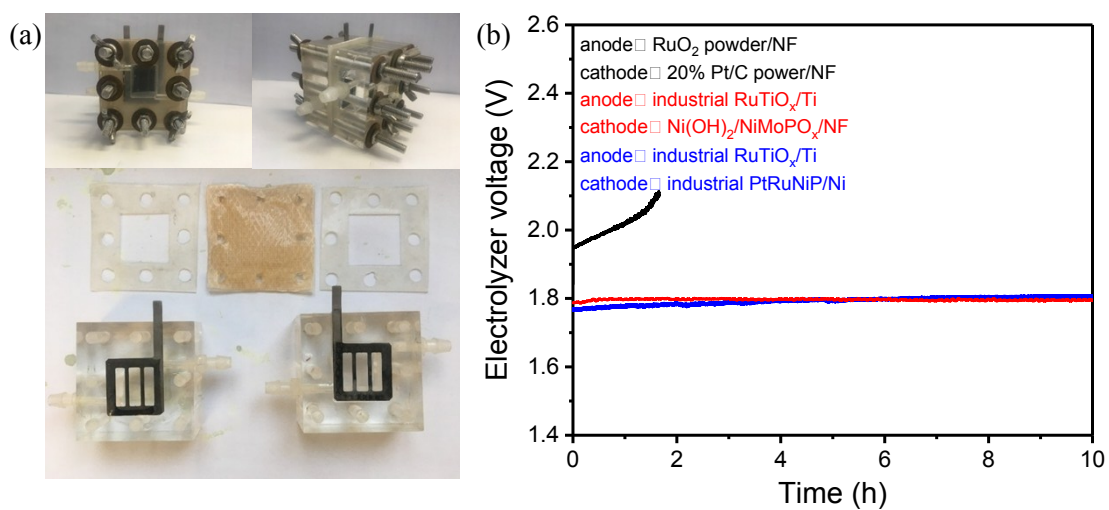

Figure S10. (a) Structure diagram of electrolyzer for water electrolysis. (b) Electrolyzer voltage at 1000 A m<sup>-1</sup> of overall water electrolysis catalyzed by different catalytic electrodes in 1.0 M NaOH.

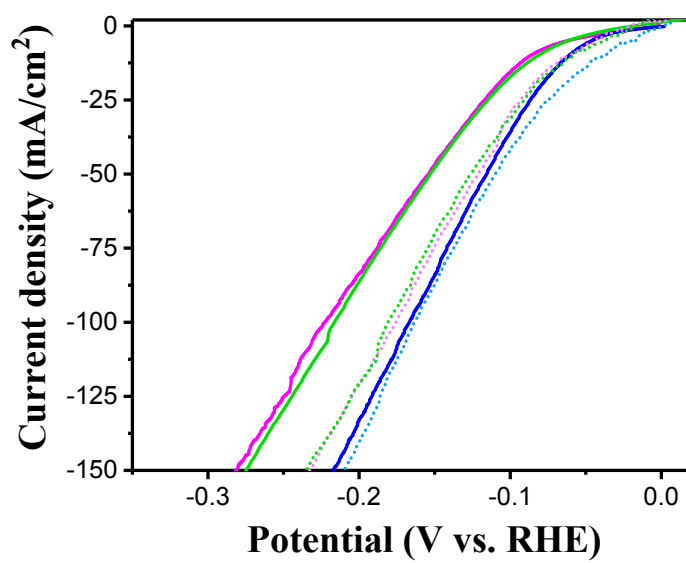

Figure S11. LSV of NiMoPO<sub>x</sub>/NF, Ni(OH)<sub>2</sub>/NiMoPO<sub>x</sub>/NF and Ni(OH)<sub>2</sub>/NiMoPO<sub>x</sub>/NF-acid electrodes without iR correction.



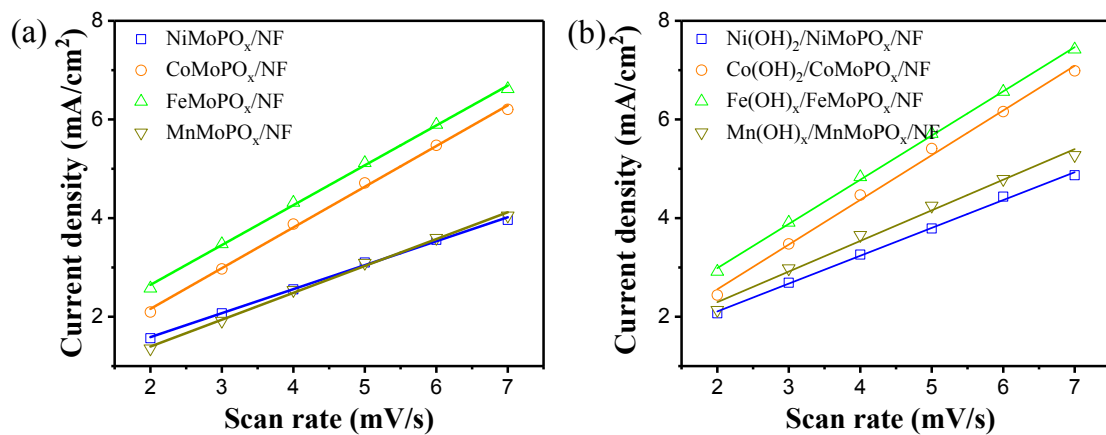

Figure S12. Estimation of  $C_{dl}$  of M(Ni, Co, Fe, Mn)-MoPO<sub>x</sub>/NF (a) before and (b) after activation by plotting the current density variation ( $\Delta j = (j_a - j_c)/2$ ).

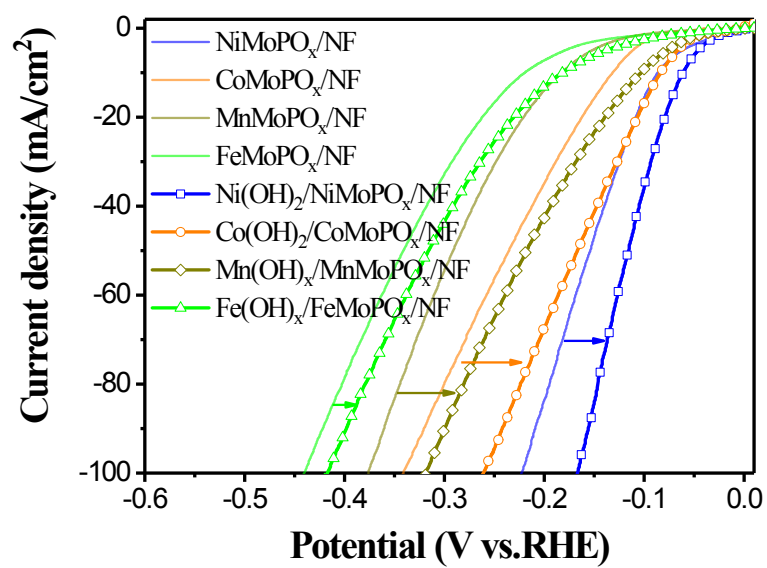

Figure S13. The ECSA-normalized HER polarization curves for M(OH)<sub>2</sub>/M-MoPO<sub>x</sub>/NF without iR correction (M=Ni, Co, Fe, Mn).

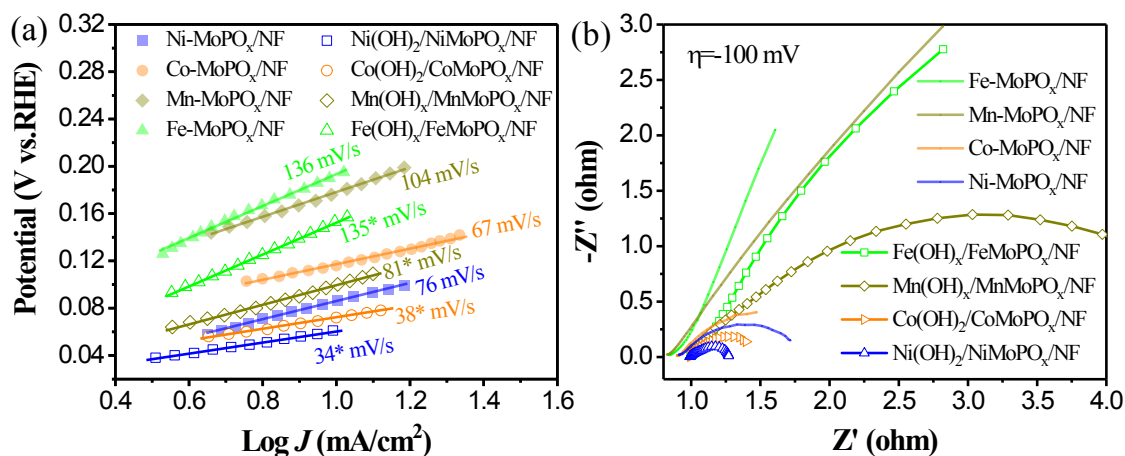

Figure S14. (a) Tafel slopes of M(Ni, Co, Fe, Mn)-MoPO<sub>x</sub>/NF and their activated M(OH)<sub>2</sub>/M-MoPO<sub>x</sub>/NF electrodes without iR correction; (b) Nyquist plots for the corresponding samples measured at a voltage of -0.1 V (vs RHE) over the frequency range 100 kHz to 0.01 Hz in 1.0 M NaOH.

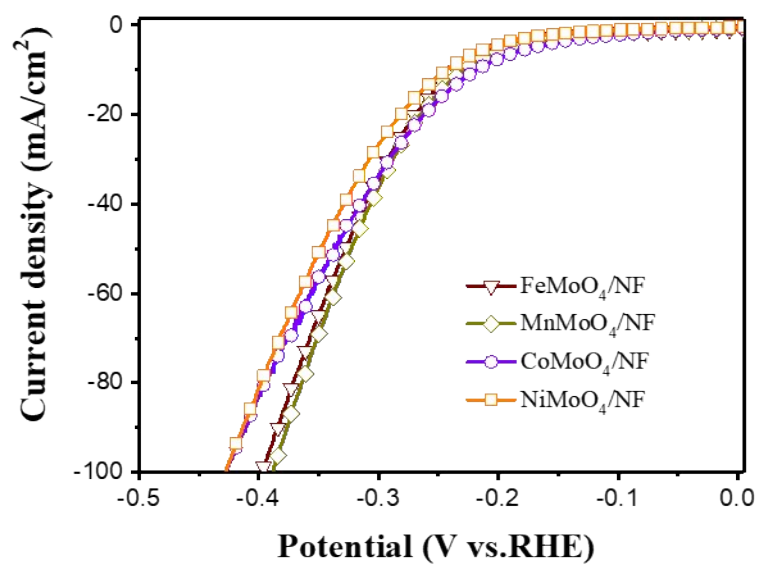

Figure S15. (a) LSV of M(Ni, Co, Fe, Mn)-MoO<sub>4</sub>/NF precursors at 1.0 M NaOH.

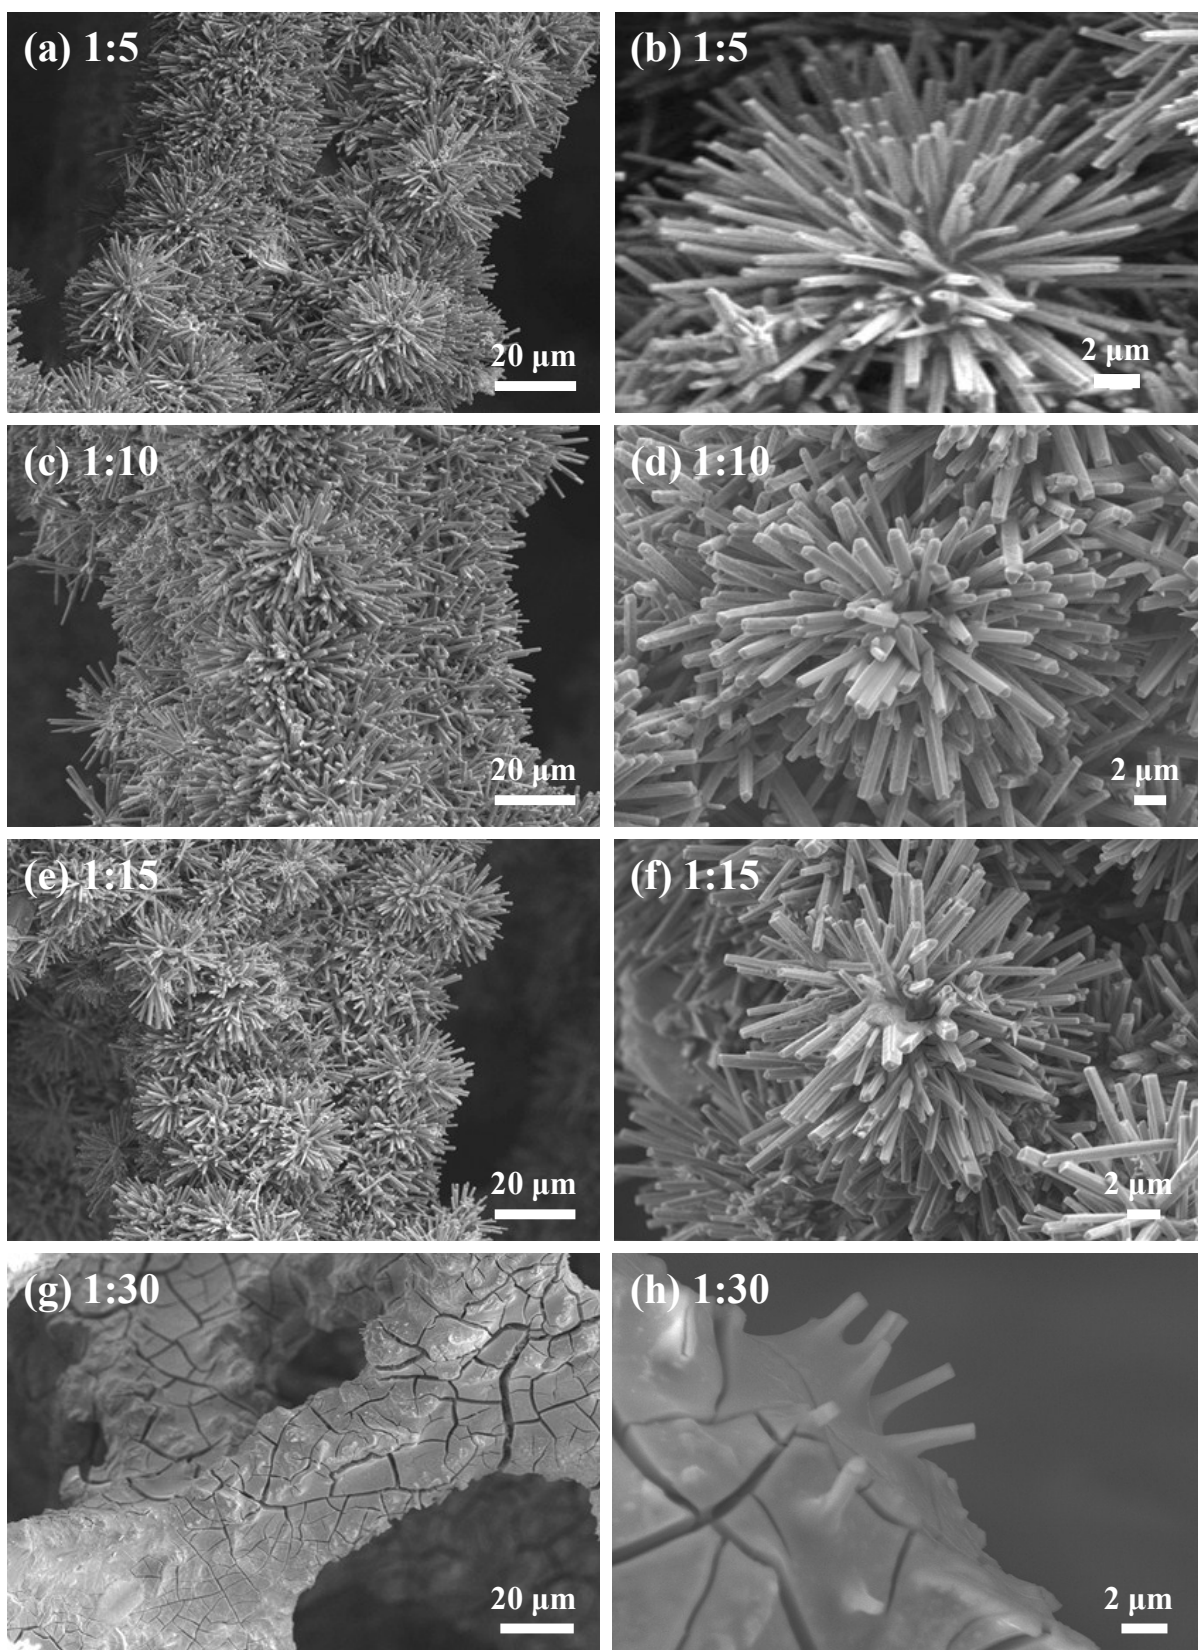

Figure S16. SEM images of  $\text{NiMoPO}_x/\text{NF}$  electrodes with different phosphorus sources.

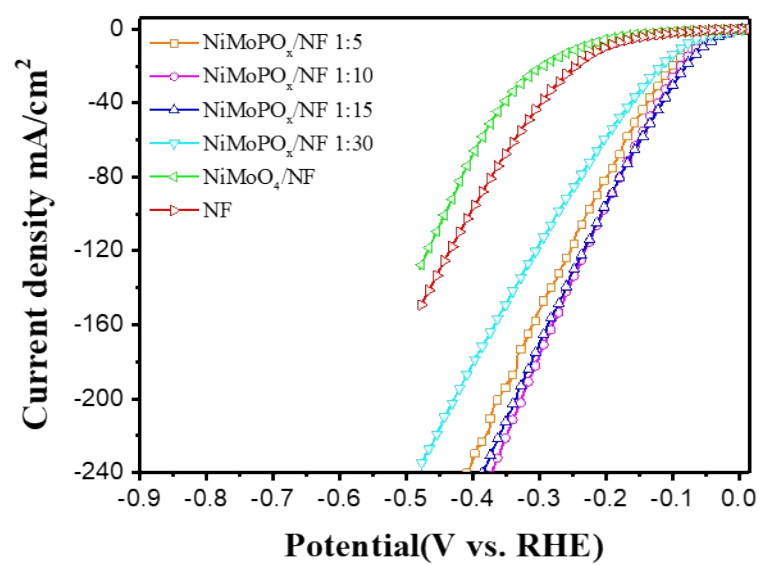

Figure S17. LSV of NiMoPO<sub>x</sub>/NF prepared with different phosphorus sources at 400°C for 2 h tested in 1.0 M NaOH.

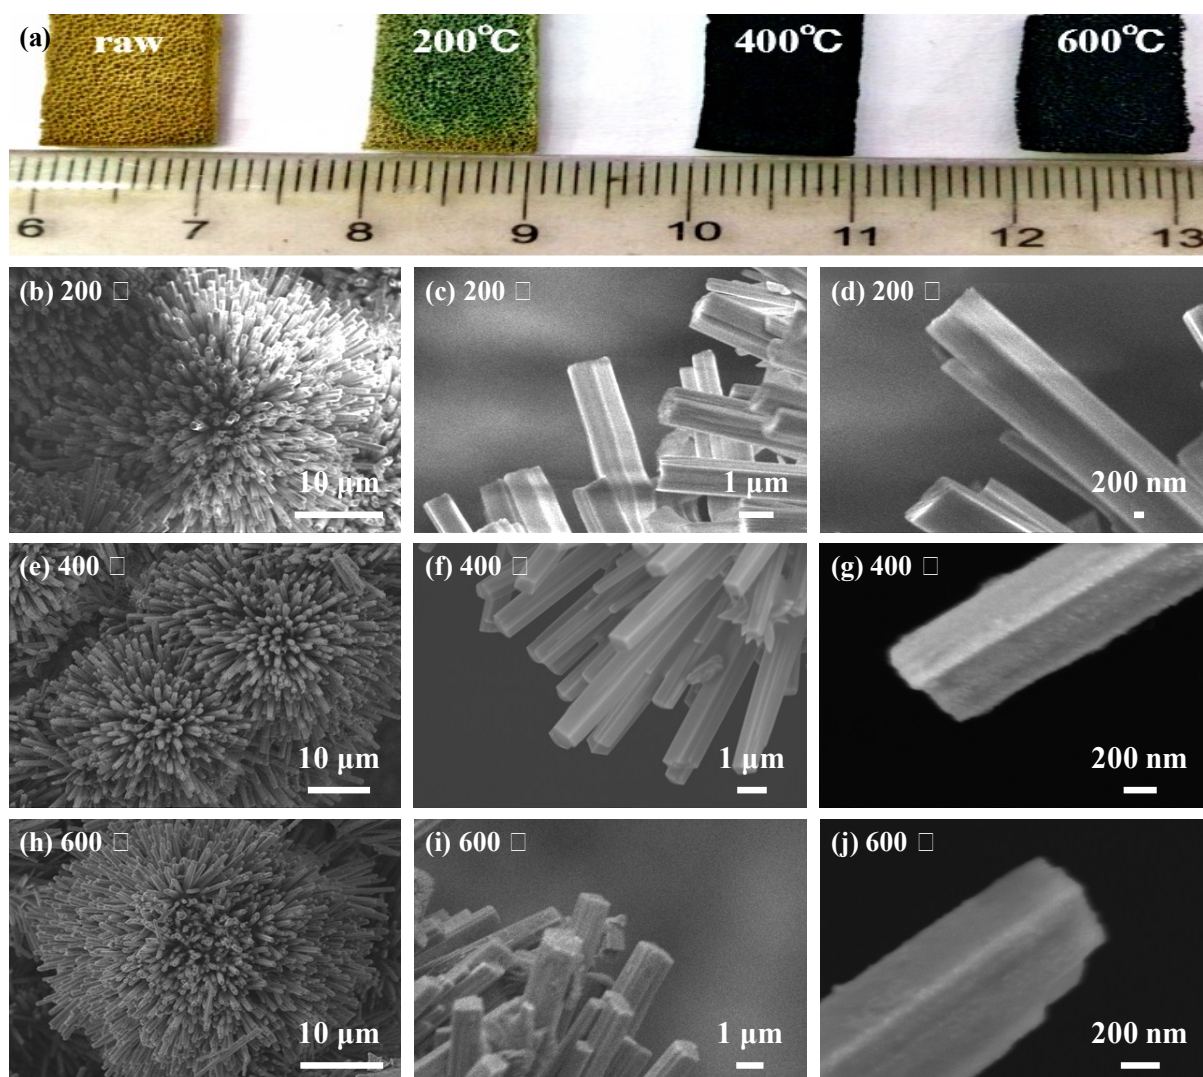

Figure S18. SEM images of NiMoPO<sub>x</sub>/NF electrodes with different phosphating temperatures for 2 h.

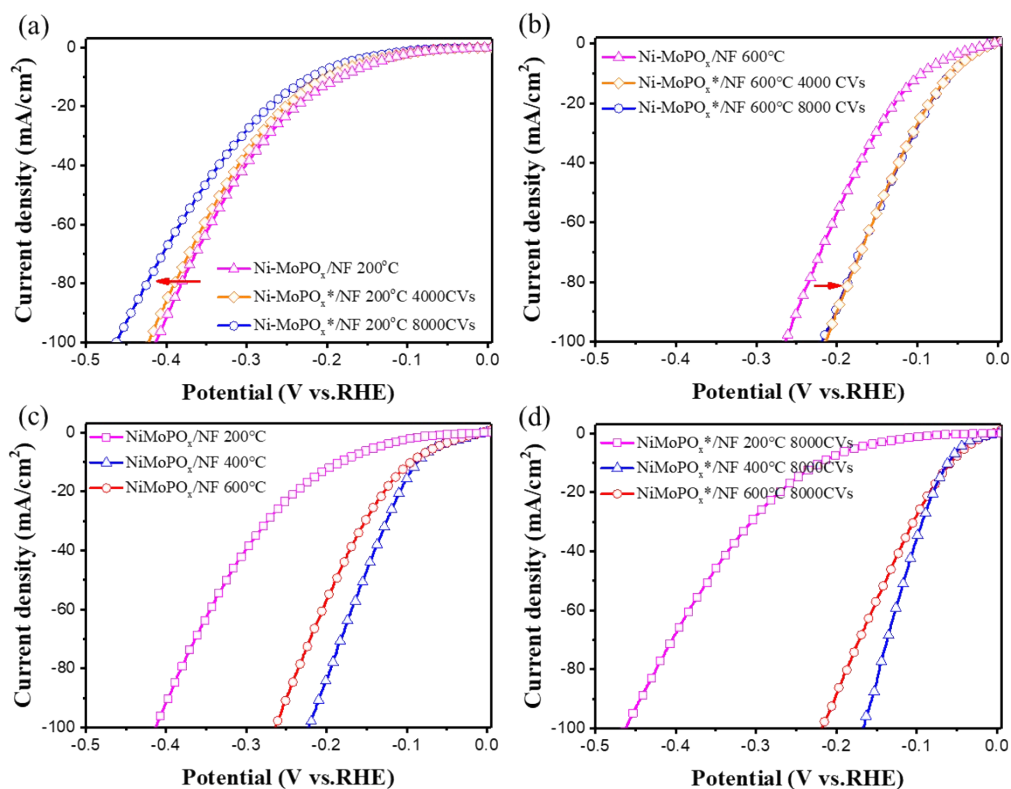

Figure S19. LSV curves of (a) NiMoPO<sub>x</sub>/NF 200°C and (b) NiMoPO<sub>x</sub>\*/NF 600°C activated with different CVs; LSV curves of (c) NiMoPO<sub>x</sub>/NF and (d) NiMoPO<sub>x</sub>\*/NF with different phosphating temperature for 2 h.



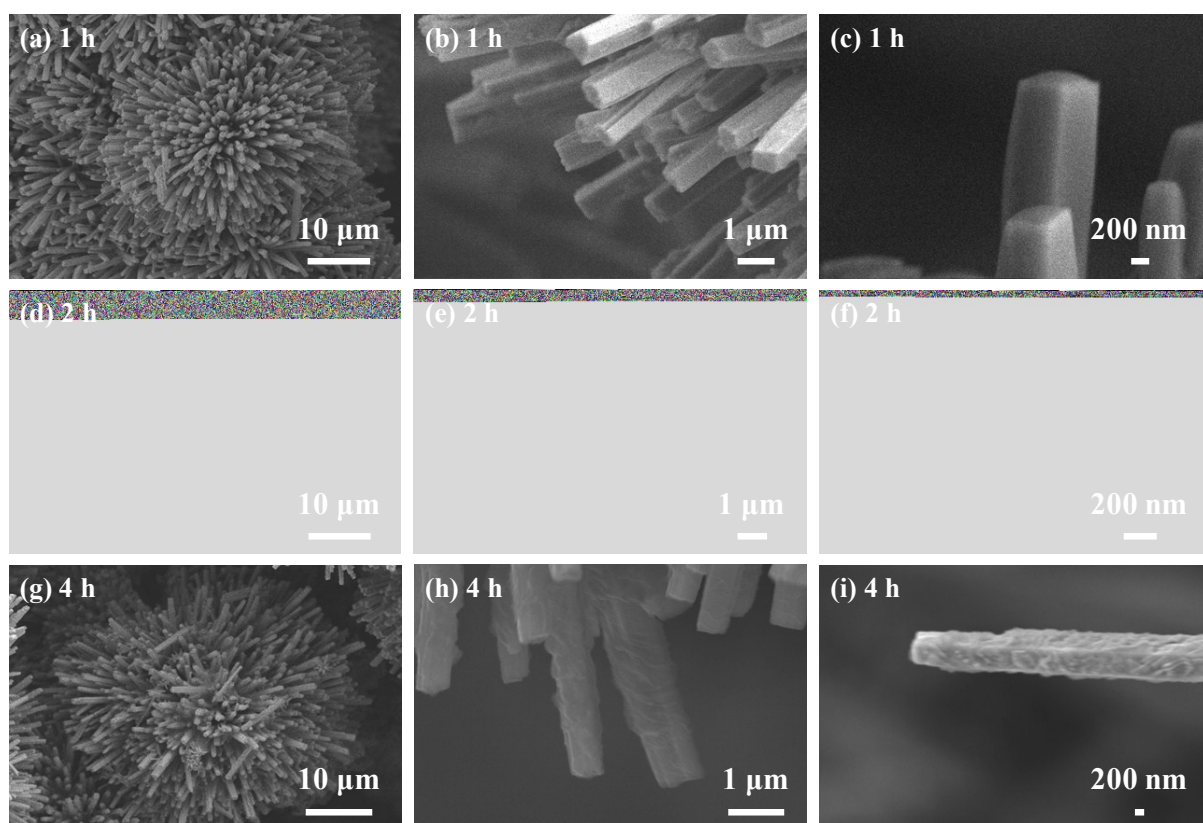

Figure S20. SEM images of NiMoPO<sub>x</sub>/NF electrodes at 400°C with different phosphating time.

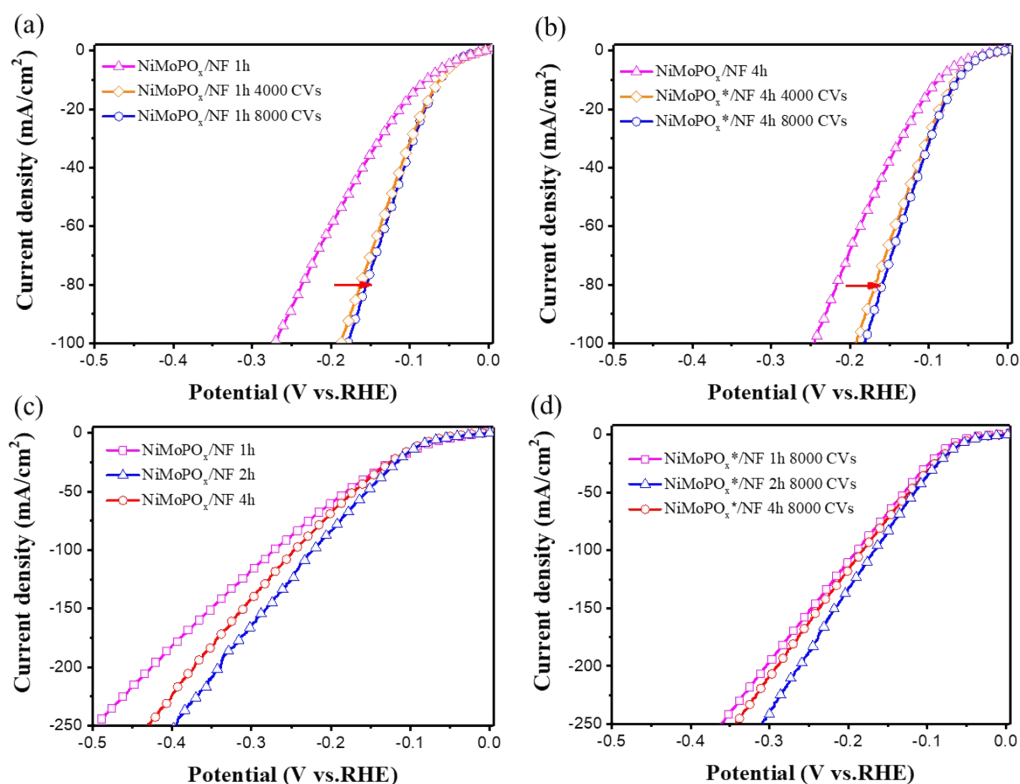

Figure S21. LSV curves of (a) NiMoPO<sub>x</sub>/NF 1h and (b) NiMoPO<sub>x</sub>/NF 4h activated with different CVs; LSV curves of (c) NiMoPO<sub>x</sub>/NF and (d) NiMoPO<sub>x</sub>\*/NF with different phosphating time after 8000 CVs. All these samples were phosphatized at 400°C.

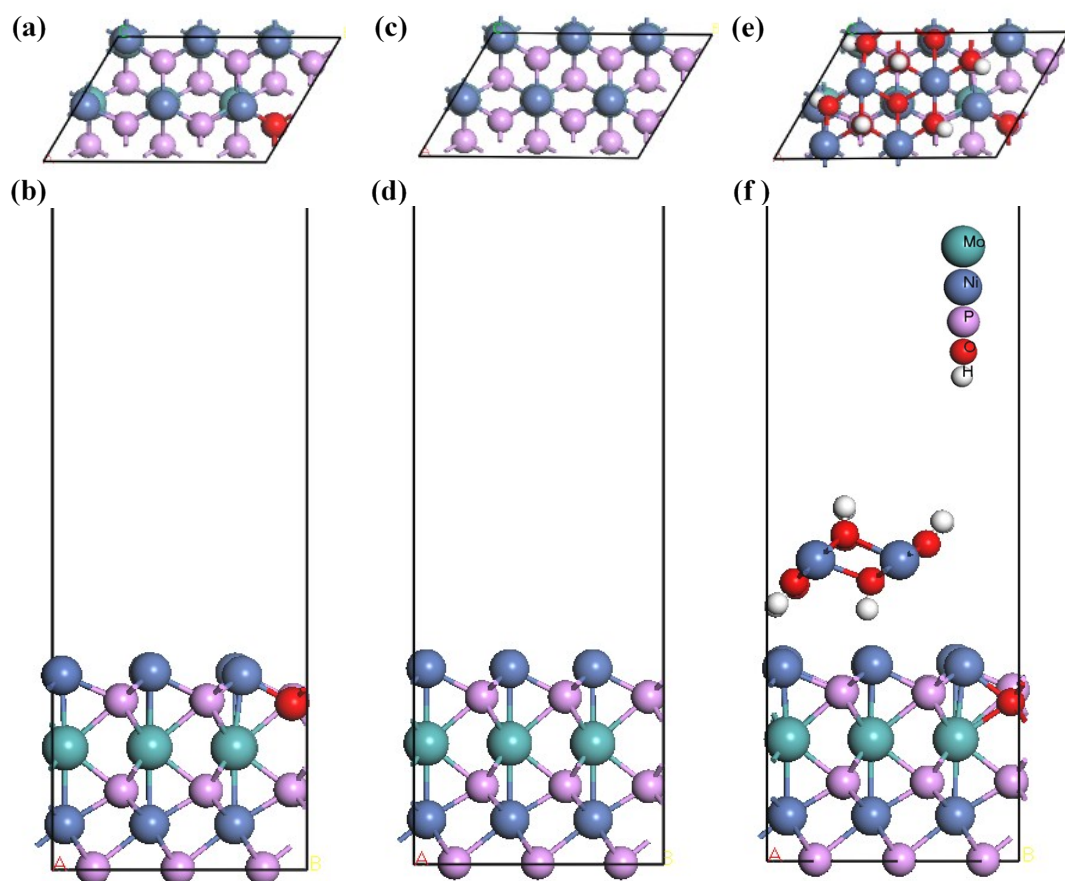

Figure S22. The (2x3) slab models of (a, b)  $\text{NiMoP}_2\text{O}$ , (c, d)  $\text{NiMoP}_2$  and (e, f)  $\text{Ni(OH)}_2/\text{NiMoP}_2\text{O}$ .

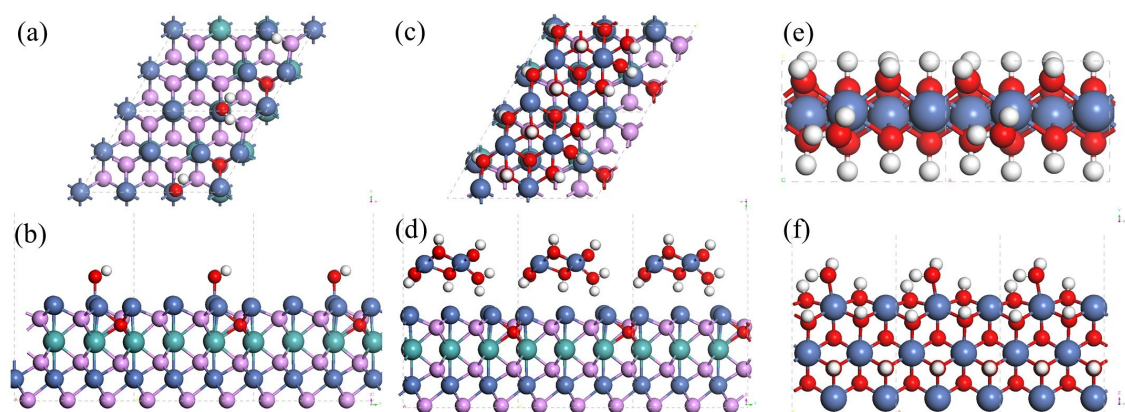

Figure S23. The (2x3) slab models of H<sub>2</sub>O adsorbed on (a, b) NiMoP<sub>2</sub>O, (c, d) Ni(OH)<sub>2</sub>/NiMoP<sub>2</sub>O and (e, f) Ni(OH)<sub>2</sub>.

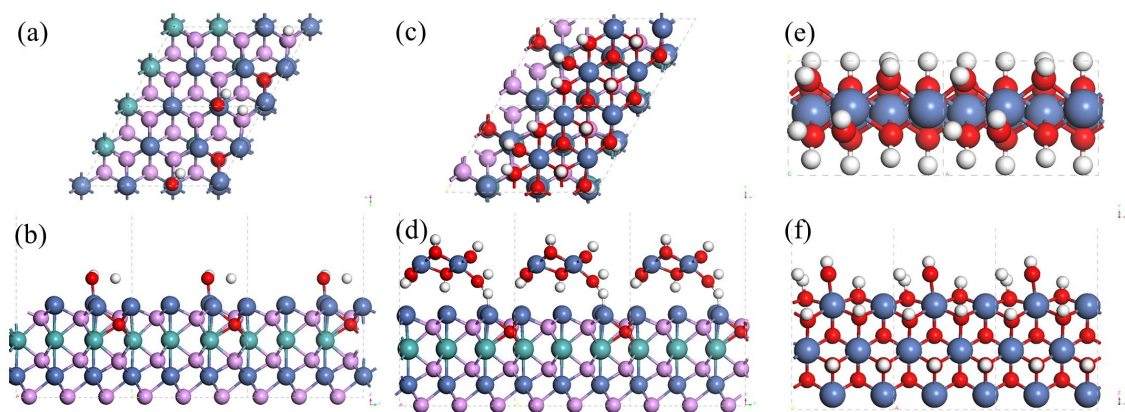

Figure S24. The (2x3) slab models of  $\text{H}_2\text{O}$  dissociated on (a, b)  $\text{NiMoP}_2\text{O}$ , (c, d)  $\text{Ni(OH)}_2/\text{NiMoP}_2\text{O}$  and (e, f)  $\text{Ni(OH)}_2$ .

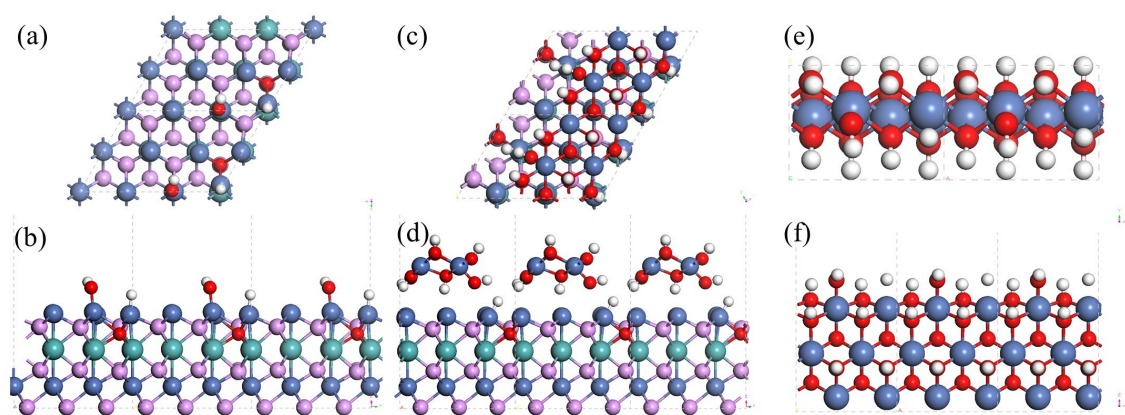

Figure S25. The (2x3) slab models of H and OH adsorbed on (a, b) NiMoP<sub>2</sub>O, (c, d) Ni(OH)<sub>2</sub>/NiMoP<sub>2</sub>O and (e, f) Ni(OH)<sub>2</sub>.

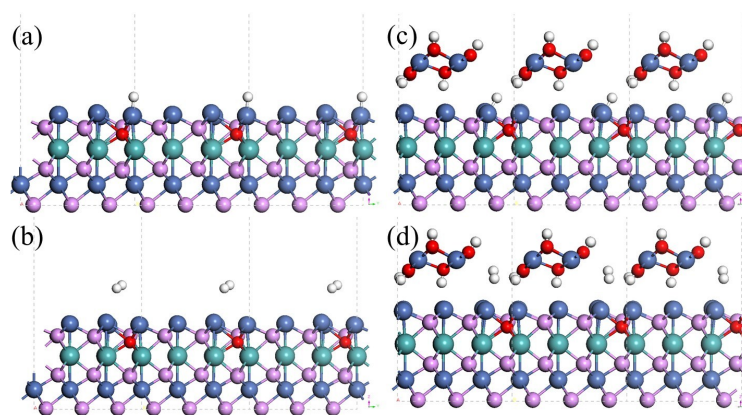

Figure S26. The (2x3) slab models of  $\text{H}_2$  formation on (a, b)  $\text{NiMoP}_2\text{O}$ , (c, d)  $\text{Ni(OH)}_2/\text{NiMoP}_2\text{O}$ .

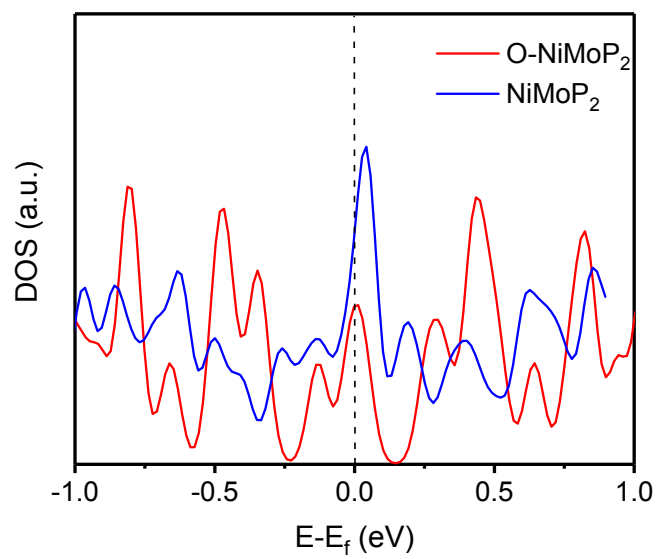

Figure S27. Calculated density of states (DOS) of the oxygen incorporated NiMoP<sub>2</sub> slab and the pristine NiMoP<sub>2</sub> slab.



Table S1. Elements contents of NiMoPO<sub>x</sub> and the activated Ni(OH)<sub>2</sub>/NiMoPO<sub>x</sub>.

| Catalysts                                | Elements<br>(atm %) |                 | Ni               |                  |                      | Mo               |                  | P    |       |      | O    |       |      |
|------------------------------------------|---------------------|-----------------|------------------|------------------|----------------------|------------------|------------------|------|-------|------|------|-------|------|
|                                          | Total (%)           |                 | 9.35             |                  |                      | 2.87             |                  |      | 19.79 |      |      | 67.99 |      |
| NiMoPO <sub>x</sub>                      | specials            | Ni <sup>0</sup> | Ni <sup>2+</sup> | Ni <sup>3+</sup> | Mo <sup>&lt;4+</sup> | Mo <sup>4+</sup> | Mo <sup>6+</sup> | M-P  | P-O   | M-O  | C-O  | O-H   | O-P  |
|                                          | Content             | 0.12            | 0.51             | 0.37             | 0.08                 | 0.43             | 0.49             | 0.04 | 0.96  | 0.41 | 0.40 | 0     | 0.19 |
|                                          | Total (%)           |                 | 17.57            |                  |                      | 2.33             |                  |      | 7.26  |      |      | 72.84 |      |
| Ni(OH) <sub>2</sub> /NiMoPO <sub>x</sub> | specials            | Ni <sup>0</sup> | Ni <sup>2+</sup> | Ni <sup>3+</sup> | Mo <sup>&lt;4+</sup> | Mo <sup>4+</sup> | Mo <sup>6+</sup> | M-P  | P-O   | M-O  | C-O  | O-H   | O-P  |
|                                          | Content             | 0.03            | 0.82             | 0.15             | 0.06                 | 0.42             | 0.52             | 0.11 | 0.89  | 0.30 | 0.36 | 0.27  | 0.07 |
|                                          | Total (%)           |                 | 17.57            |                  |                      | 2.33             |                  |      | 7.26  |      |      | 72.84 |      |

Table S2. Elements contents of (Co/Fe/Mn)MoPO<sub>x</sub> and their corresponding activated hybrids.

| <b>Catalysts</b>                         | <b>Elements<br/>(atm %)</b> | <b>M (Co/Fe/Mn)</b> | <b>Mo</b> | <b>P</b> | <b>O</b> |
|------------------------------------------|-----------------------------|---------------------|-----------|----------|----------|
|                                          |                             |                     |           |          |          |
| CoMoPO <sub>x</sub>                      |                             | 7.63                | 3.37      | 19.04    | 67.96    |
| Co(OH) <sub>2</sub> /CoMoPO <sub>x</sub> |                             | 17.82               | 2.87      | 9.58     | 69.72    |
| FeMoPO <sub>x</sub>                      |                             | 25.32               | 24.93     | 7.10     | 42.65    |
| Fe(OH) <sub>x</sub> /FeMoPO <sub>x</sub> |                             | 35.22               | 17.58     | 4.68     | 42.52    |
| MnMoPO <sub>x</sub>                      |                             | 23.14               | 7.66      | 17.14    | 52.06    |
| Mn(OH) <sub>x</sub> /MnMoPO <sub>x</sub> |                             | 38.14               | 6.92      | 5.59     | 49.35    |

Table S3. HER performances of NiMoO<sub>x</sub>/NF, NiMoPO<sub>x</sub>/NF, Ni(OH)<sub>2</sub>/NiMoPO<sub>x</sub>/NF, 20% Pt/C/NF and NF.

| Catalysts                                    | Overpotential<br>(mV)    |                           | Tafel<br>slope<br>(mV dec <sup>-1</sup> ) | C <sub>dl</sub><br>(mF cm <sup>-2</sup> ) | R <sub>ct</sub> (Ω)<br>(η= -100<br>mV) |
|----------------------------------------------|--------------------------|---------------------------|-------------------------------------------|-------------------------------------------|----------------------------------------|
|                                              | 10<br>mA/cm <sup>2</sup> | 100<br>mA/cm <sup>2</sup> |                                           |                                           |                                        |
| 20% Pt/C/NF                                  | 31                       | 154                       | 33                                        | /                                         | 0.43                                   |
| NiMoO <sub>4</sub> /NF                       | 234                      | 328                       | 101                                       | 0.8                                       | 162.24                                 |
| NiMoP <sub>2</sub> /NF                       | 80                       | 216                       | 92                                        | 56.6                                      | 2.86                                   |
| NiMoPO <sub>x</sub> /NF                      | 77                       | 123                       | 72                                        | 48.6                                      | 0.84                                   |
| Ni(OH) <sub>2</sub> /NiMoPO <sub>x</sub> /NF | 51                       | 72                        | 34                                        | 56.5                                      | 0.27                                   |
| Ni(OH) <sub>2</sub> /NF                      | 251                      | 396                       | 121                                       | 10.8                                      | >200                                   |
| NF                                           | 202                      | 314                       | 140                                       | 8.4                                       | 72.12                                  |

Table S4. HER performances of M(Ni, Co, Fe, Mn)-MoPO<sub>x</sub>/NF and their activated M(OH)<sub>x</sub>/MMoPO<sub>x</sub>/NF electrodes.

| Catalysts<br>Parameters                             | FeMoPO <sub>x</sub> /NF |      | MnMoPO <sub>x</sub> /NF |      | CoMoPO <sub>x</sub> /NF |      | NiMoPO <sub>x</sub> /NF |      |
|-----------------------------------------------------|-------------------------|------|-------------------------|------|-------------------------|------|-------------------------|------|
|                                                     | -                       | *    | -                       | *    | -                       | *    | -                       | *    |
| Onset potential (mV)                                | 139                     | 75   | 111                     | 49   | 80                      | 38   | 32                      | 29   |
| $\eta$ @ -10 mA/cm <sup>2</sup> (mV)                | 192                     | 153  | 177                     | 100  | 116                     | 72   | 87                      | 61   |
| $\eta$ @ -100 mA/cm <sup>2</sup> (mV)               | 370                     | 345  | 360                     | 302  | 258                     | 191  | 222                     | 166  |
| Tafel slope (mV/dec)                                | 136                     | 135  | 104                     | 81   | 67                      | 38   | 76                      | 34   |
| R <sub>ct</sub> ( $\Omega$ )<br>( $\eta$ = -100 mV) | 19.56                   | 8.86 | 13.29                   | 6.50 | 1.15                    | 0.56 | 0.84                    | 0.27 |
| C <sub>dl</sub> (mF/cm <sup>2</sup> )               | 80.8                    | 89.6 | 54.5                    | 62.1 | 82.6                    | 90.6 | 48.6                    | 56.5 |

Note: - means the M-MoPO<sub>x</sub>/NF samples, and \* means their corresponding M(OH)<sub>x</sub>/MMoPO<sub>x</sub>/NF samples.

Table S5. Summary of the HER performances of nonprecious materials based electrocatalysts in alkaline electrolytes reported recently.

| Electrocatalysts                              | Electrolyte | Substrate     | Loading density<br>(mg cm <sup>-2</sup> ) | Counter<br>electrode | Overpotential<br>(mV@10 mA cm <sup>-2</sup> ) | Tafel slope<br>(mV dec <sup>-1</sup> ) | Reference                                              |
|-----------------------------------------------|-------------|---------------|-------------------------------------------|----------------------|-----------------------------------------------|----------------------------------------|--------------------------------------------------------|
| Ni(OH) <sub>2</sub> /NiMoPO <sub>x</sub>      | 1 M NaOH    | Ni Foam       | 1.0                                       | Carbon Rod           | 51                                            | 34                                     | This work                                              |
| Co(OH) <sub>2</sub> /CoMoPO <sub>x</sub>      | 1 M NaOH    | Ni Foam       | 1.0                                       | Carbon Rod           | 72                                            | 38                                     | This work                                              |
| CoMnCH@NF                                     | 1 M KOH     | Ni Foam       | 5.6                                       | Pt Wire              | 180                                           | /                                      | <i>J. Am. Chem. Soc.</i> <b>2017</b> , 139, 8320-8328. |
| Cu NDs/Ni <sub>3</sub> S <sub>2</sub> NTs-CFs | 1 M KOH     | Carbon Fibers | 0.52                                      | Graphite Rod         | 128                                           | 76.2                                   | <i>J. Am. Chem. Soc.</i> <b>2018</b> , 140, 610-617.   |
| Ni-MoS <sub>2</sub> -CC                       | 1 M KOH     | Carbon Cloth  | 0.89                                      | Graphite Rod         | 98                                            | 60                                     | <i>Energy Environ. Sci.</i> <b>2016</b> , 9, 2789-2793 |
| NiCo <sub>2</sub> P <sub>x</sub> /CF          | 1 M KOH     | Carbon Fibers | 5.9                                       | Pt sheet             | 58                                            | 34.3                                   | <i>Adv. Mater.</i> <b>2017</b> , 29, 1605502.          |
| CoMoP@C                                       | 1 M KOH     | Glassy Carbon | 0.354                                     | Graphite Rod         | 81                                            | 55.5                                   | <i>Energy Environ. Sci.</i> <b>2017</b> , 10, 788-798  |
| MoP@C                                         | 1 M KOH     | Carbon        | ~6.0                                      | Graphite             | 49                                            | 54                                     | <i>Adv. Energy Mater.</i>                              |

|                                               |         |               |       |              |     |    |                                                      |
|-----------------------------------------------|---------|---------------|-------|--------------|-----|----|------------------------------------------------------|
|                                               |         | Cloth         |       | Rod          |     |    | <b>2018</b> , 8, 1801258.                            |
| FLNPC@MoPNC/MoP-C                             | 1 M KOH | Carbon Cloth  | 2.42  | Carbon Rod   | 69  | 52 | <i>Adv. Funct. Mater.</i> <b>2018</b> , 28, 1801527. |
| MoP-C                                         | 1 M KOH | Glassy Carbon | 0.84  | Graphite Rod | 169 | 70 | <i>Nano Energy</i> <b>2017</b> , 32, 511-519.        |
| MoS <sub>2</sub> /Co(OH) <sub>2</sub>         | 1 M KOH | Glassy Carbon | 0.285 | Graphite Rod | 125 | 76 | <i>Adv. Mater.</i> <b>2018</b> , 30, 1801171         |
| MoS <sub>2</sub> Confined Co(OH) <sub>2</sub> | 1 M KOH | Glassy Carbon | 0.2   | Graphite Rod | 89  | 53 | <i>ACS Nano</i> <b>2018</b> , 12, 4565-4573.         |
| Ni(OH) <sub>2</sub> /MoS <sub>2</sub>         | 1 M KOH | Carbon Cloth  | 4.8   | Pt Foil      | 80  | 60 | <i>Nano Energy</i> <b>2017</b> , 37, 74-80           |

---

Table S6. HER performances of NiMoPO<sub>x</sub>/NF and their corresponding Ni(OH)<sub>2</sub>/NiMoPO<sub>x</sub>/NF electrodes with different phosphating conditions.

| Catalysts                              | NiMoPO <sub>x</sub> /NF |     |
|----------------------------------------|-------------------------|-----|-------------------------|-----|-------------------------|-----|-------------------------|-----|-------------------------|-----|
|                                        | 200 °C-2 h              |     | 400 °C-2 h              |     | 600 °C-2 h              |     | 400 °C-1 h              |     | 400 °C-4 h              |     |
|                                        | -                       | *   | -                       | *   | -                       | *   | -                       | *   | -                       | *   |
| Onset potential<br>(mV)                | 94                      | 121 | 32                      | 29  | 45                      | 29  | 45                      | 42  | 40                      | 32  |
| η @ -10 mA/cm <sup>2</sup><br>(mV)     | 182                     | 220 | 87                      | 61  | 95                      | 58  | 88                      | 72  | 79                      | 64  |
| η @ -100<br>mA/cm <sup>2</sup><br>(mV) | 413                     | 462 | 222                     | 166 | 264                     | 218 | 271                     | 189 | 245                     | 183 |
| j @-400 mV<br>(mA/cm <sup>2</sup> )    | 92                      | 68  | 255                     | 349 | 212                     | 232 | 181                     | 284 | 224                     | 305 |

Note: - means the NiMoPO<sub>x</sub>/NF samples, and \* means their corresponding Ni(OH)<sub>2</sub>/NiMoPO<sub>x</sub>/NF samples.
